# Supplementary material for: Comparisons of Estimated Intakes and Plasma Concentrations of Selected Fatty Acids in Pregnancy
Source: PubMed Central journal article supplement (PMC6470916; doi:10.3390/nu11030568), 2019-03-06

**Table S1.** Difference in **biomarker** concentration (%TPFA) per 1 percentage increase in relative fatty acid intake and correlations between biomarker concentration and intake from Spearman statistics unless indicated otherwise (n=255).

|                | Regression coefficients (95% CI) from linear regressions   |                                                                | Correlation coefficients |
|----------------|------------------------------------------------------------|----------------------------------------------------------------|--------------------------|
|                | Non-adjusted                                               | Adjusted for age, parity, BMI, smoking and total energy intake |                          |
| <b>EPA</b>     | <b>0.44 (0.20; 0.69)</b> % per 1% relative increase/day ** | <b>0.43 (0.17; 0.68)</b> % per 1% relative increase/day*       | <b>0.24 ***</b>          |
| <b>DHA</b>     | <b>0.52 (0.25; 0.80)</b> % per 1% relative increase/day ** | <b>0.44 (0.15; 0.73)</b> % per 1 % relative increase/day *     | <b>0.21 **</b>           |
| <b>EPA+DHA</b> | <b>0.51 (0.26; 0.77)</b> % per 1% relative increase/day ** | <b>0.45 (0.19; 0.72)</b> % per 1 % relative increase/day *     | <b>0.23 **</b>           |
| <b>ALA</b>     | 0.02 (-0.02; 0.06) % per 1% relative increase/day          | 0.03 (-0.01; 0.06) % per 1 % relative increase/day             | 0.06 <sup>a</sup>        |
| <b>LA</b>      | 0.10 (-0.06; 0.27) % per 1% relative increase/day          | 0.06 (-0.11; 0.23) % per 1 % relative increase/day             | 0.08                     |
| <b>AA</b>      | 0.85 (-1.97; 2.66) % per 1% relative increase/day          | 1.26 (-1.84; 3.35) % per 1 % relative increase/day             | 0.06 <sup>a</sup>        |

BOLD =  $P < 0.05$ , \* =  $P < 0.01$ , \*\* =  $P < 0.001$ , \*\*\* =  $P < 0.0001$

<sup>a</sup>: Pearson correlation

AA: arachidonic acid; ALA:  $\alpha$ -linolenic acid; BMI: body mass index; DHA: docohexaenoic acid; EPA: eicosapentaenoic acid; LA: linoleic acid; %TPFA: percentage of total plasma fatty acids

**Table S2a.** Difference in **biomarker** concentration (%TPFA) per increase in daily intake and correlations between biomarker concentration and intake from Spearman statistics unless indicated otherwise. Stratified to samples stored at -196 °C since 2013 (n=203)

|                | Regression coefficients from linear regressions (95% CI) |                                                                | Correlation coefficients |
|----------------|----------------------------------------------------------|----------------------------------------------------------------|--------------------------|
|                | Non-adjusted                                             | Adjusted for age, parity, BMI, smoking and total energy intake |                          |
| <b>EPA</b>     | <b>0.05 (0.01; 0.08)</b> % per 100 mg/day *              | <b>0.05 (0.01; 0.08)</b> % per 100 mg/day *                    | <b>0.22 *</b>            |
| <b>DHA</b>     | <b>0.04 (0.00; 0.07)</b> % per 100 mg/day                | <b>0.04 (0.00; 0.07)</b> % per 100 mg/day                      | <b>0.15</b>              |
| <b>EPA+DHA</b> | <b>0.04 (0.01; 0.08)</b> % per 100 mg/day *              | <b>0.04 (0.01; 0.07)</b> % per 100 mg/day *                    | <b>0.18 *</b>            |
| <b>ALA</b>     | <b>0.03 (0.00; 0.05)</b> % per 1 g/day                   | <b>0.07 (0.03; 0.11)</b> % per 1 g/day **                      | <b>0.15<sup>a</sup></b>  |
| <b>LA</b>      | 0.06 (-0.06; 0.19) % per 1 g/day                         | 0.04 (-0.20; 0.27) % per 1 g/day                               | 0.06                     |
| <b>AA</b>      | <0.001 (-0.03; 0.03) % per 10 mg/day                     | 0.01 (-0.02; 0.04) % per 10 mg/day                             | <0.01 <sup>a</sup>       |

Model 2: Adjusted for age, parity, BMI, smoking and total energy intake

BOLD =  $P < 0.05$ , \* =  $P < 0.01$ , \*\* =  $P < 0.001$ , \*\*\* =  $P < 0.0001$

<sup>a</sup>: Pearson correlation

AA: arachidonic acid; ALA:  $\alpha$ -linolenic acid; BMI: body mass index; DHA: docohexaenoic acid; EPA: eicosapentaenoic acid; LA: linoleic acid; %TPFA: percentage of total plasma fatty acids

**Table S2b.** Plasma sample storage temperatures (n=252)

| Storage temperature | n   | %    |
|---------------------|-----|------|
| <b>-196 °C</b>      | 203 | 80.6 |
| <b>-80 °C</b>       | 40  | 15.9 |
| <b>-20 °C</b>       | 9   | 3.6  |

**Figure S1.** Quartile mean intake of EPA+ DHA (g/day) and the corresponding plasma concentration of EPA+DHA (% TFA) (n=255).

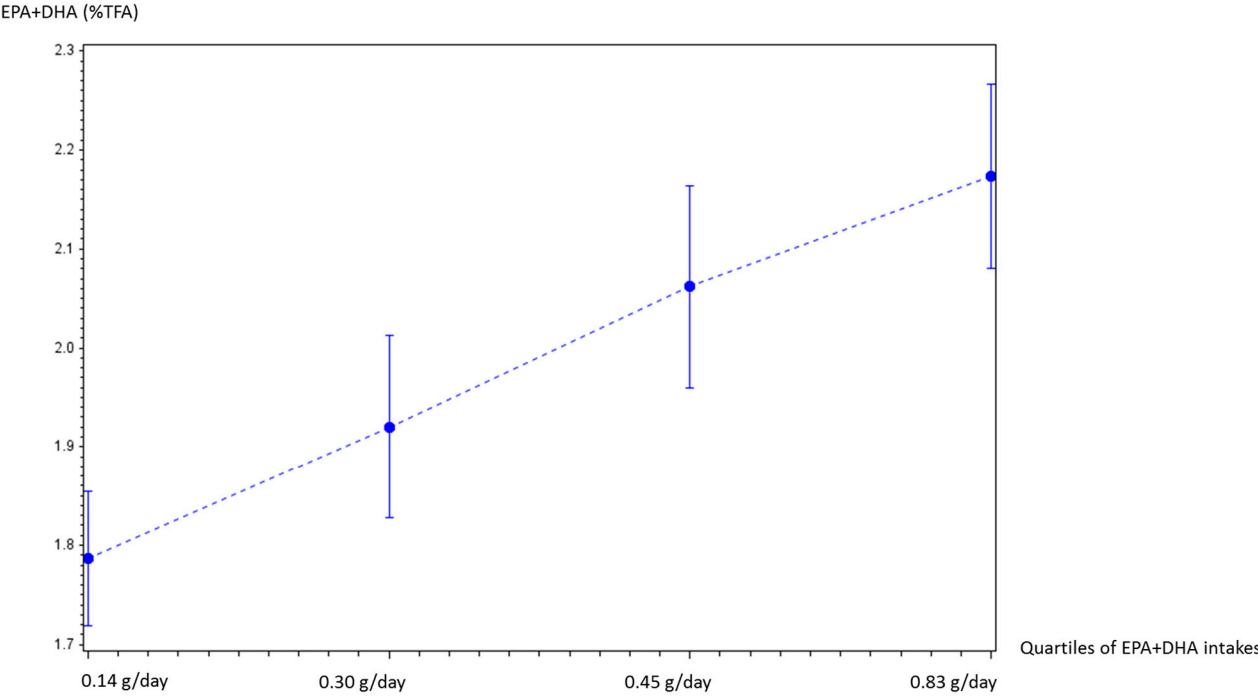

Supplement: nutrients-11-00568-s001.pdf [file nutrients-11-00568-s001.pdf]
